# Supplementary material for: Localized High-Concentration Electrolyte (LHCE) for Fast Charging Lithium-Ion Batteries
Source: MDPI journal article supplement (doi:10.3390/batteries9030155), 2023-02-28
Supplement: s1 [file s1]

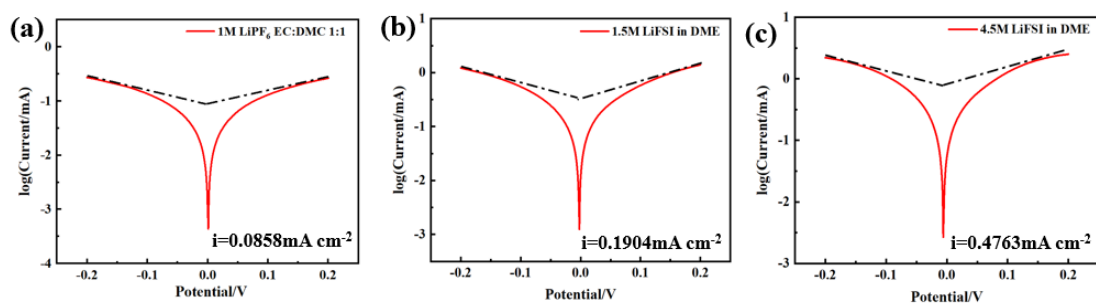

**Figure S1.** Tafel curves of Li||Li batteries in different electrolytes. (a) RCE, (b) LCE, (c) HCE.

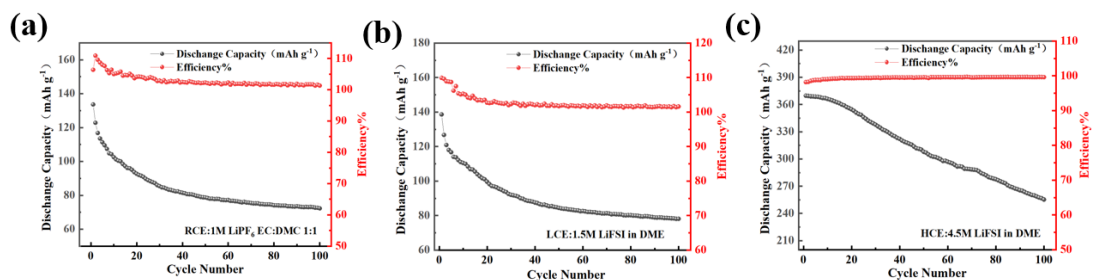

**Figure S2.** Cycle performance of Li||C batteries in different electrolytes. (a) RCE, (b) LCE, (c) HCE.

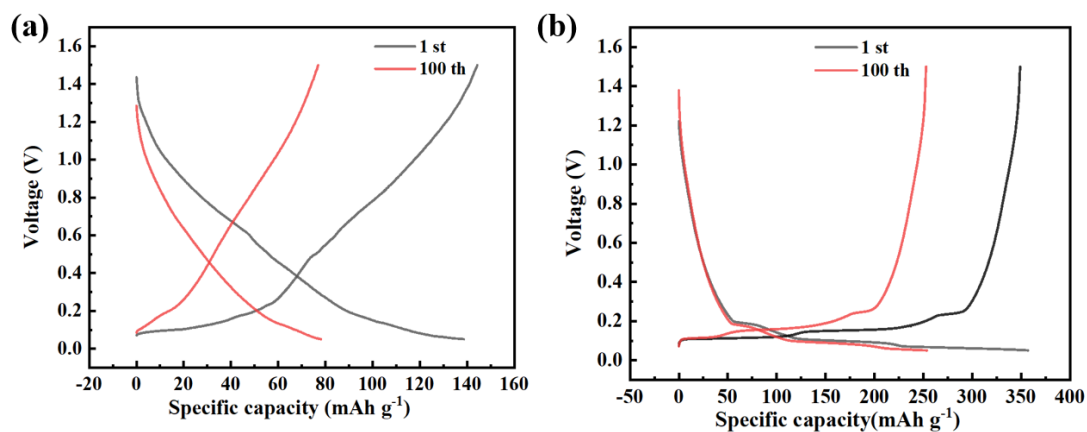

**Figure S3.** Capacity-voltage curves of Li||C batteries cycled in different electrolytes for the 1st and 100th cycles. (a) LCE, (b) HCE.

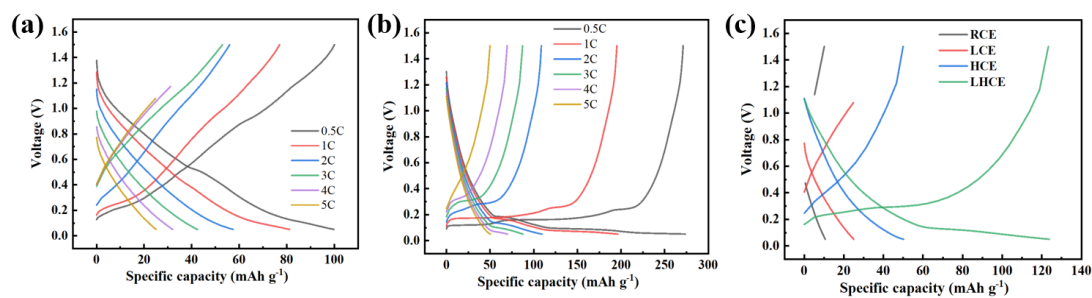

**Figure S4.** Capacity-voltage curves of Li||C batteries in different electrolytes at different rates. (a) LCE, (b) HCE, (c) Capacity-voltage curves of Li||C batteries in four electrolytes at 5C rate.

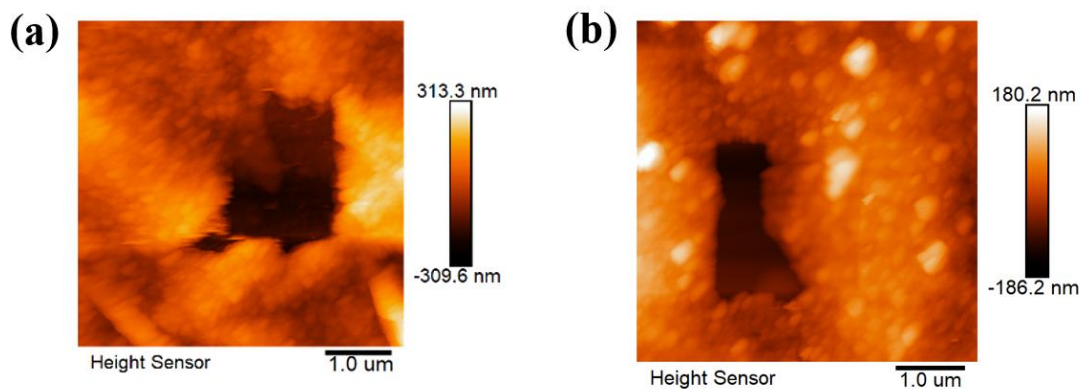

**Figure S5.** The SEI film appearance was removed by the AFM tip with a force of 5V. (a) RCE, (b) LHCE.

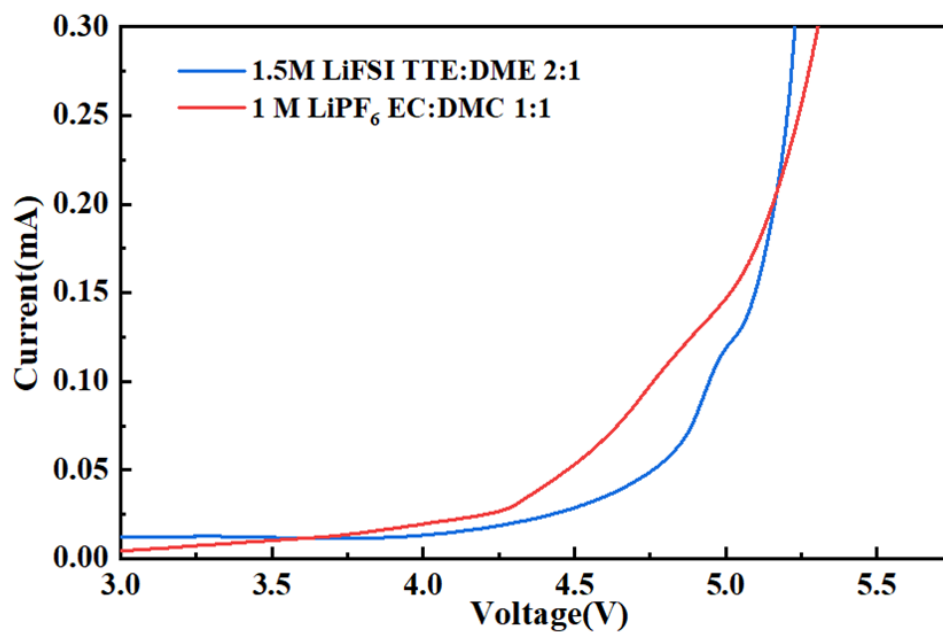

**Figure S6.** LSV curves of two electrolytes.

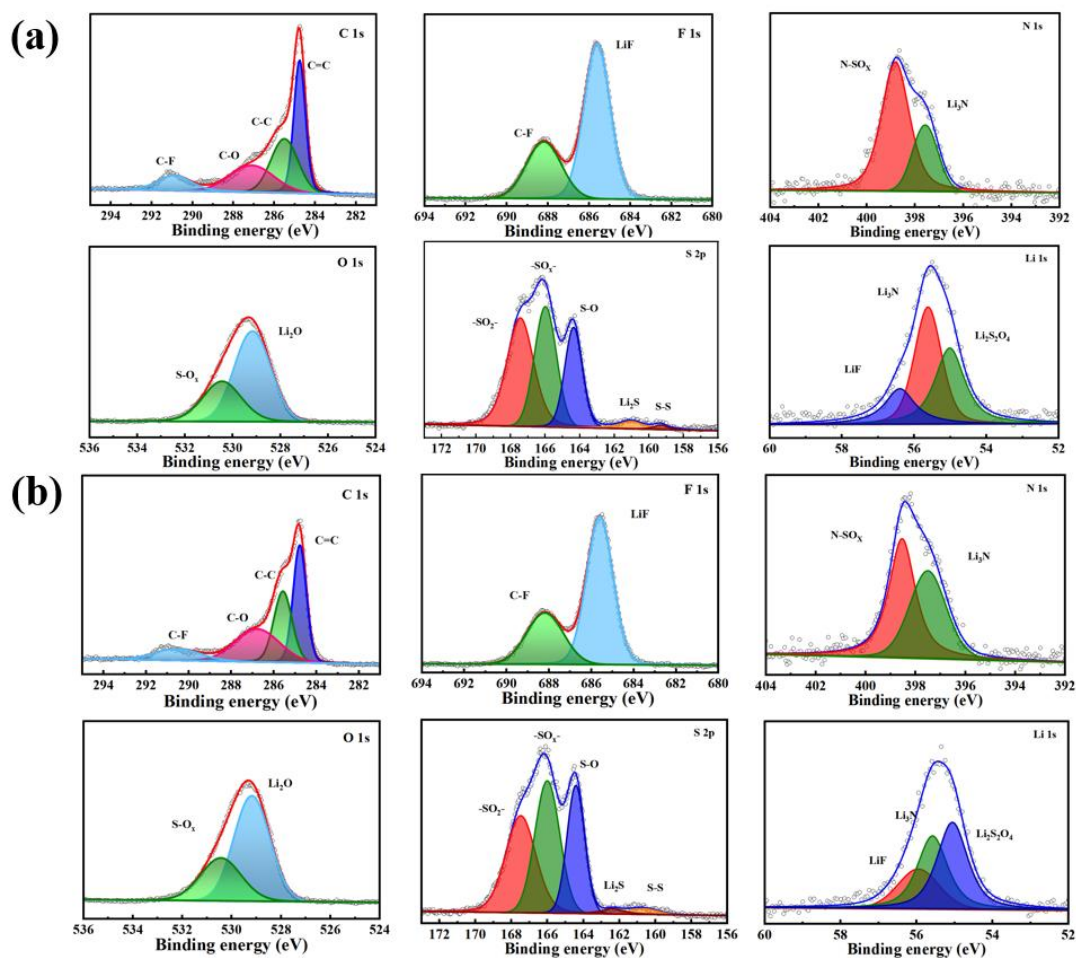

**Figure S7.** XPS analysis of graphite anode after three cycles in electrolyte. (a) LCE, (b) HCE.

**Table S1. Research progress and comparison of LHCE**

| Year | Li metal battery       | Electrolyte                                               | Cycleability                                             | Feature                                                                | Ref        |
|------|------------------------|-----------------------------------------------------------|----------------------------------------------------------|------------------------------------------------------------------------|------------|
| 2021 | Li  NCM87              | TMP:LiDFOB:D <sub>2</sub><br>2:1:5                        | 135 mAh g <sup>-1</sup> (3 C)                            | electrochemical potential window : 5.2 V<br>Nonflammable               | [41]       |
| 2022 | LFP  Li                | 1.1 M LiFSI PFPN: DME<br>2: 1                             | 130.8 mAh g <sup>-1</sup> (5 C)                          | electrochemical potential window : 4.62 V<br>Nonflammable              | [42]       |
| 2022 | Li-S                   | LiTFSI:DME:DOL:TME<br>1:1.5:1.5:6                         | 554.68 mAh g <sup>-1</sup> (0.5 C<br>400th)              | electrochemical potential window : 4.8 V                               | [43]       |
| 2021 | Li  NCM523             | 2.3 M LiFSI DME: TTE<br>4:5                               | 2.4 mAh cm <sup>-2</sup> (3.2 C)                         | electrochemical potential window : 4.3 V                               | [44]       |
| 2022 | Li  NCM523             | LiFSI:DME:FB<br>(1:1.2:3.2)                               | 3.1 mAh cm <sup>-2</sup> (0.33 C)                        | exchange current density<br>(0.26 mA/cm <sup>2</sup> )<br>Nonflammable | [45]       |
| 2023 | Li   NMC811            | LiFSI:FEC:DME 1:0.1:1.4<br>+TTE +LiDFOB                   | 155 mAh g <sup>-1</sup> (0.5 C<br>charge, 1 C discharge) | electrochemical potential window : 4.5 V                               | [46]       |
| 2020 | Li  C                  | 1.5 M LiFSI BTFE:DME                                      | 90 mAh g <sup>-1</sup> (-20°C,0.1C)                      | electrochemical potential window : 4.3 V                               | [30]       |
| 2020 | Li  LiCoO <sub>2</sub> | 1.2 M LiPF <sub>6</sub><br>FEC/DMC/HFE + 0.15 M<br>LiDFOB | 168 mAh g <sup>-1</sup> (1 mA cm <sup>-2</sup> ,300th)   | electrochemical potential window : 4.85 V                              | [47]       |
| 2020 | Li  NCM523             | 2 M LiFSI-DMC/1,2-<br>dfBen                               | 120 mAh g <sup>-1</sup> (0.5 C,<br>140th)                | 1,2-dfBen                                                              | [48]       |
| 2023 | Li  C                  | 1.5 M LiFSI TTE:DME<br>2:1                                | 124 mAh g <sup>-1</sup> (5 C)                            | electrochemical potential window : 5.1 V                               | This study |
